# Supplementary material
Source: PubMed Central journal article supplement (PMC4573315)
Supplement: NIHMS717768-supplement-Supp_TableS1-S8___FigureS1-S3.pdf [file NIHMS717768-supplement-Supp_TableS1-S8___FigureS1-S3.pdf]

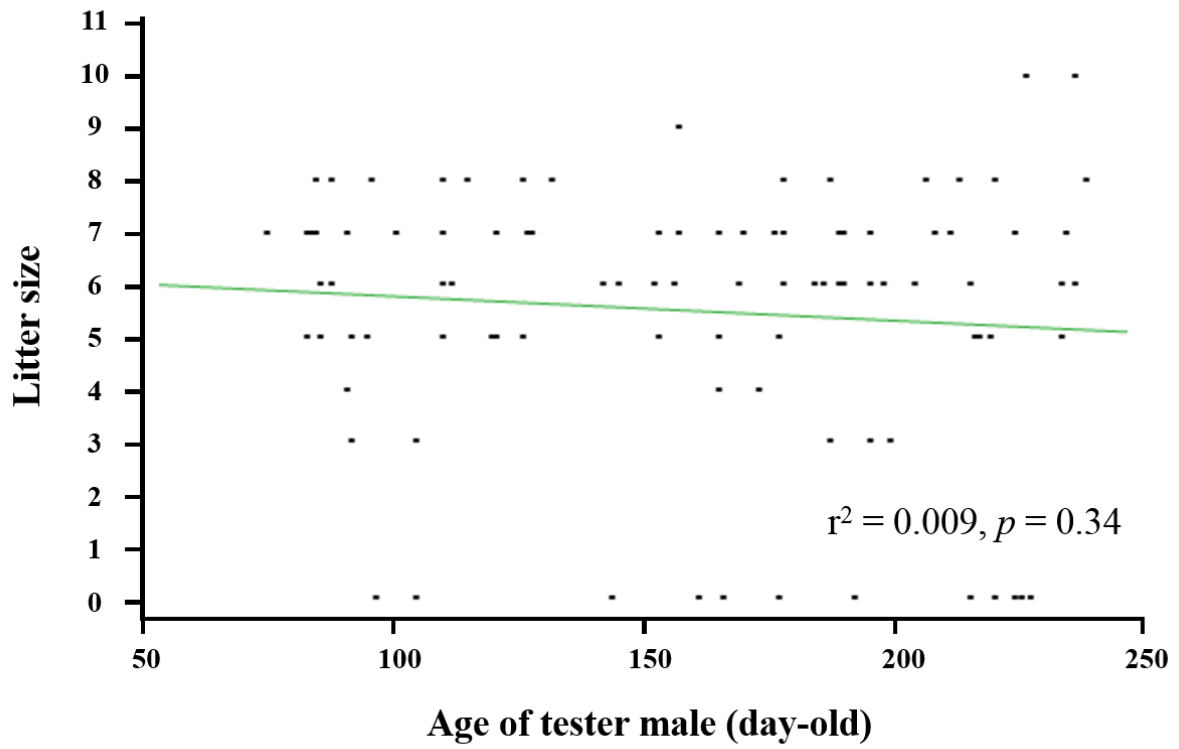

**Figure S1. No relationship between litter size and age of tester males.** Each dot representing individual hybrids (n = 85).

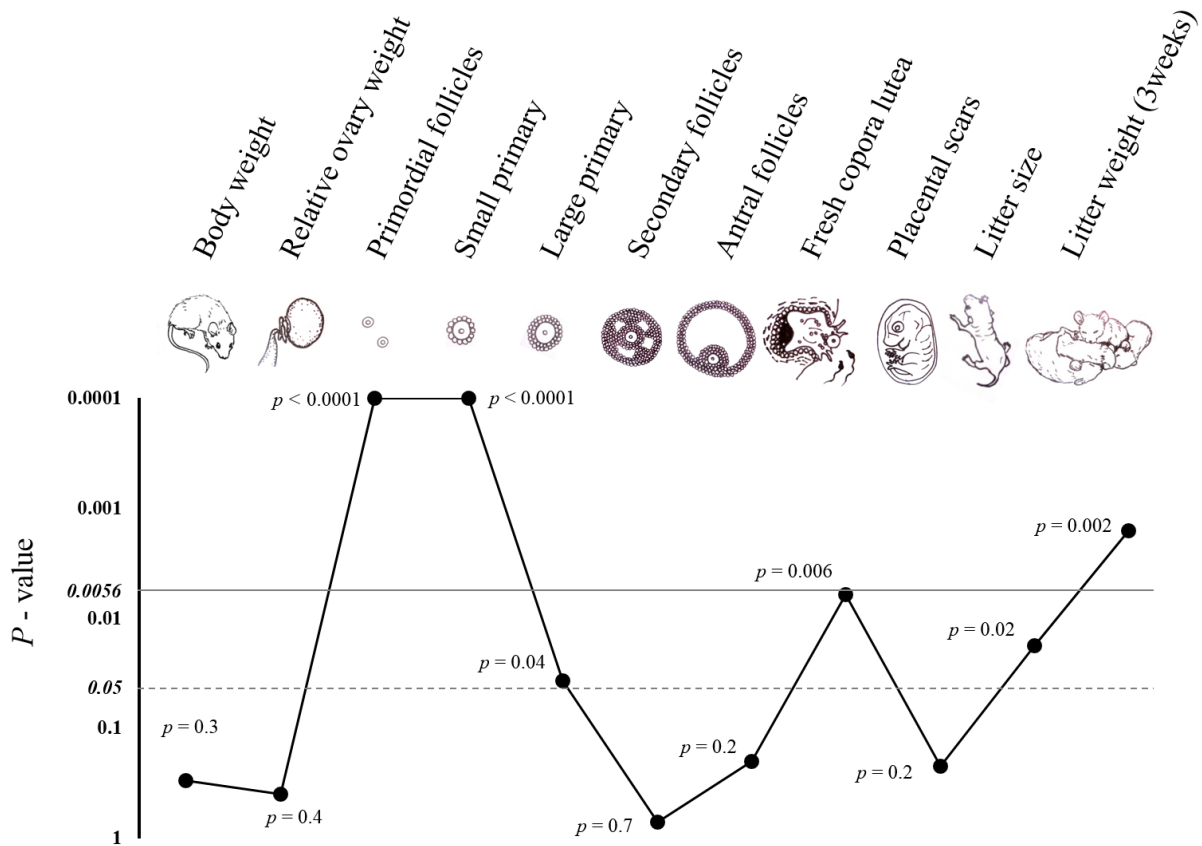

**Figure S2. Hybrid female fertility along reproductive time scale.** X-axis indicates reproductive traits in their developmental sequence, and the Y-axis shows  $p$ -values in log scale indicating the significant difference between combined controls and combined hybrids based on Wilcoxon rank sum test.  $p = 0.05$  is indicated with a dashed line and Bonferroni correction ( $\alpha=0.0056$ ) is indicated in solid line. For all reproductive parameters, low  $p$ -values are always associated with reduced fertility the same direction for reduced fertility in hybrids relative to controls.

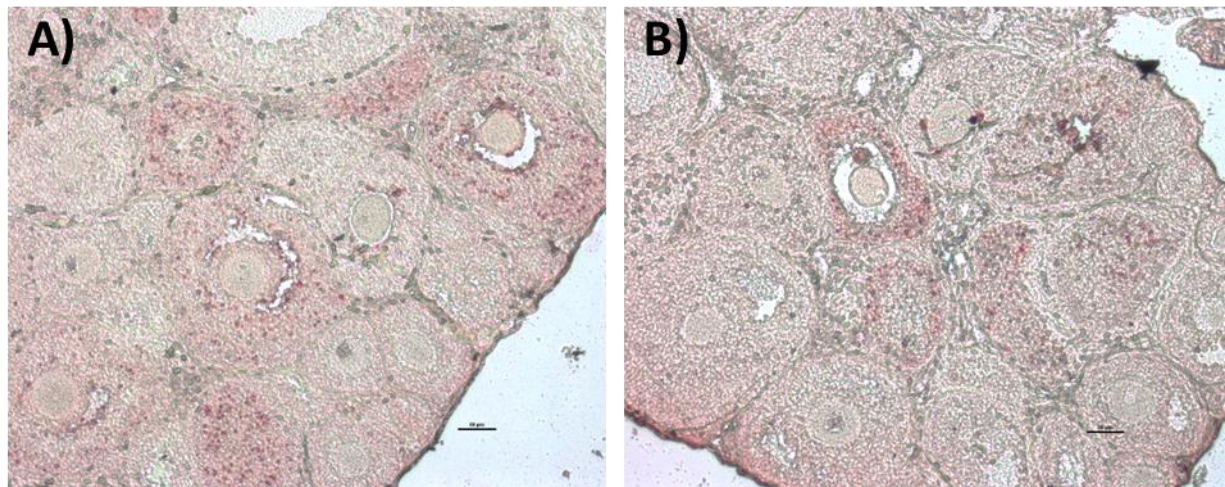

**Figure S3. No significant differences between apoptotic cells between controls and hybrids.**

Apoptotic cells for secondary follicles and antral follicles were counted using TUNEL assay at 21 day-old females. A) Ovary section of control genotype (*M. m. musculus*<sup>PWK</sup> / *M. m. musculus*<sup>CZECH</sup>). B) Ovary section of hybrid genotype (*M. m. musculus*<sup>PWK</sup> / *M. m. domesticus*<sup>WSB</sup>).

**Table S1.** Phenotype scores for each of the 106 mice at 63 day-old.

| Genotype    | ID       | Body weight (g) | ROW (mg/g) | Litter size | Total litter weight (g) | Embryo survival (%) | Placental scars | Corpora lutea | Antral follicles | Secondary follicles | Large primary | Small primary | Primordial follicles |
|-------------|----------|-----------------|------------|-------------|-------------------------|---------------------|-----------------|---------------|------------------|---------------------|---------------|---------------|----------------------|
| PWK x CZECH | TAS-H33  | 13.2            | 0.449      | 8           | 53.5                    | 100.0               | 8               | 16            | 200              | 520                 | 1200          | 5360          | 2920                 |
| PWK x CZECH | TAS-H34  | 12.9            | 0.451      | 7           | 57.1                    | 100.0               | 7               | 25            | 440              | 800                 | 2240          | 6120          | 3200                 |
| PWK x CZECH | TAS-H35  | 14.5            | 0.495      | 9           | 63.4                    | 100.0               | 9               | 30            | 280              | 840                 | 1440          | 5360          | 2400                 |
| PWK x CZECH | TAS-H91  | 12              | 0.425      | 7           | 51.5                    | 100.0               | 7               | 12            | 160              | 200                 | 720           | 3200          | 2800                 |
| PWK x CZECH | TAS-H92  | 12.2            | 0.456      | 5           | 31.8                    | 55.6                | 9               | 16            | 120              | 480                 | 960           | 3440          | 2720                 |
| PWK x CZECH | TAS-H93  | 12.6            | 0.390      | 8           | 58.5                    | 100.0               | 8               | 12            | 200              | 400                 | 1120          | 3560          | 2360                 |
| PWK x CZECH | TAS-H103 | 11.7            | 0.493      | 6           | 54.3                    | 75.0                | 8               | -             | -                | -                   | -             | -             | -                    |
| PWK x CZECH | TAS-H104 | 11.3            | 0.473      | 7           | 62.6                    | 100.0               | 7               | -             | -                | -                   | -             | -             | -                    |
| PWK x CZECH | TAS-H105 | 13.1            | 0.456      | 8           | 58.8                    | 100.0               | 9               | 27            | 320              | 760                 | 520           | 3760          | 3080                 |
| PWK x CZECH | TAS-H106 | 12.8            | 0.469      | 8           | 61.1                    | 100.0               | 8               | 26            | 240              | 360                 | 1120          | 3640          | 2280                 |
| PWK x CZECH | TAS-H107 | 12.8            | 0.445      | 8           | 68.7                    | 88.9                | 9               | 23            | 120              | 800                 | 920           | 4000          | 2440                 |
| LEWES x WSB | TAS-H42  | 13.5            | 0.329      | 6           | 67.6                    | 85.7                | 7               | 25            | 200              | 560                 | 1560          | 4920          | 4640                 |
| LEWES x WSB | TAS-H43  | 14.1            | 0.347      | 6           | 63.5                    | 85.7                | 7               | 27            | 120              | 800                 | 1720          | 6280          | 5240                 |
| LEWES x WSB | TAS-H44  | 14              | 0.325      | 7           | 77.6                    | 100.0               | 7               | 24            | 240              | 600                 | 1240          | 6640          | 1400                 |
| LEWES x WSB | TAS-H45  | 13.7            | 0.347      | 7           | 70.8                    | 100.0               | 7               | 26            | 240              | 560                 | 680           | 4760          | 2040                 |
| LEWES x WSB | TAS-H94  | 13.3            | 0.298      | 5           | 55.5                    | 83.3                | 6               | 23            | 120              | 80                  | 840           | 3000          | 3520                 |
| LEWES x WSB | TAS-H95  | 13.7            | 0.363      | 7           | 69.1                    | 100.0               | 7               | 14            | 120              | 280                 | 640           | 4240          | 4680                 |
| LEWES x WSB | TAS-H112 | 14.8            | 0.376      | 7           | 78.6                    | 87.5                | 8               | 20            | 200              | 480                 | 920           | 3320          | 3920                 |
| LEWES x WSB | TAS-H113 | 13.5            | 0.379      | 6           | 62.3                    | 85.7                | 7               | 19            | 120              | 400                 | 960           | 3200          | 4720                 |
| LEWES x WSB | TAS-H114 | 13.7            | 0.333      | 5           | 57.6                    | 83.3                | 6               | 15            | 120              | 520                 | 1000          | 3360          | 3960                 |
| LEWES x WSB | TAS-H46  | 13.9            | 0.412      | 0           | n.a.                    | n.a.                | 0               | 22            | 240              | 480                 | 1920          | 7520          | 3440                 |
| PWK x LEWES | TAS-H24  | 11.2            | 0.373      | 6           | 68.8                    | 100.0               | 6               | 13            | 200              | 1040                | 840           | 4440          | 2840                 |
| PWK x LEWES | TAS-H25  | 11.6            | 0.455      | 6           | 52.5                    | 100.0               | 6               | 19            | 280              | 840                 | 1480          | 5480          | 3080                 |
| PWK x LEWES | TAS-H26  | 11.9            | 0.455      | 5           | 40.4                    | 83.3                | 6               | 13            | 480              | 800                 | 1560          | 5160          | 2960                 |
| PWK x LEWES | TAS-H31  | 13.2            | 0.346      | 7           | 62.9                    | 100.0               | 7               | -             | -                | -                   | -             | -             | -                    |
| PWK x LEWES | TAS-H32  | 15.5            | 0.316      | 6           | 54.8                    | 100.0               | 6               | -             | -                | -                   | -             | -             | -                    |
| PWK x LEWES | TAS-H67  | 13.9            | 0.384      | 8           | 64.5                    | 100.0               | 8               | 13            | 80               | 80                  | 600           | 3480          | 3480                 |
| PWK x LEWES | TAS-H68  | 13              | 0.368      | 6           | 43.2                    | 100.0               | 6               | 19            | 160              | 560                 | 960           | 4240          | 4480                 |
| PWK x LEWES | TAS-H79  | 12.7            | 0.358      | 6           | 49.7                    | 100.0               | 6               | 12            | 160              | 160                 | 920           | 3040          | 3600                 |
| PWK x LEWES | TAS-H99  | 15.1            | 0.331      | 6           | 26.1                    | 75.0                | 8               | 14            | 160              | 360                 | 760           | 1960          | 2160                 |
| PWK x LEWES | TAS-H100 | 13.5            | 0.329      | 7           | 53.1                    | 100.0               | 7               | 20            | 360              | 280                 | 760           | 2240          | 2640                 |
| PWK x LEWES | TAS-H66  | 13.3            | 0.198      | 0           | n.a.                    | n.a.                | 0               | 0             | 240              | 280                 | 600           | 1400          | 1880                 |
| LEWES x PWK | TAS-H21  | 12.2            | 0.186      | 7           | 51.8                    | 100.0               | 7               | 13            | 160              | 480                 | 920           | 2360          | 1960                 |
| LEWES x PWK | TAS-H22  | 12.8            | 0.260      | 5           | 57.8                    | 83.3                | 6               | 15            | 280              | 680                 | 1200          | 2080          | 3200                 |
| LEWES x PWK | TAS-H23  | 13.1            | 0.295      | 4           | 50.3                    | 66.7                | 6               | 14            | 360              | 520                 | 760           | 4680          | 3760                 |
| LEWES x PWK | TAS-H36  | -               | 0.418      | 6           | 67.5                    | 66.7                | 9               | 18            | 40               | 920                 | 1440          | 3280          | 3440                 |
| LEWES x PWK | TAS-H38  | -               | 0.303      | 3           | 30.7                    | 50.0                | 6               | 11            | 240              | 480                 | 1040          | 3960          | 1960                 |
| LEWES x PWK | TAS-H39  | -               | 0.373      | 7           | 66.3                    | 77.8                | 9               | 23            | 240              | 400                 | 1440          | 3720          | 2400                 |
| LEWES x PWK | TAS-H85  | 13.7            | 0.289      | 7           | 62.1                    | 77.8                | 9               | 15            | 120              | 200                 | 1080          | 2600          | 1440                 |
| LEWES x PWK | TAS-H89  | 14.7            | 0.360      | 7           | 65.9                    | 87.5                | 8               | 21            | 200              | 400                 | 1520          | 3200          | 2280                 |
| LEWES x PWK | TAS-H90  | 15.3            | 0.354      | 6           | 55.4                    | 100.0               | 6               | 20            | 240              | 480                 | 920           | 2120          | 1440                 |
| LEWES x PWK | TAS-H37  | -               | 0.236      | 0           | n.a.                    | n.a.                | 0               | 6             | 80               | 400                 | 1080          | 3200          | 2080                 |
| PWK x WSB   | TAS-H57  | 14.2            | 0.480      | 6           | 43.1                    | 85.7                | 7               | 22            | 120              | 400                 | 920           | 3440          | 2000                 |
| PWK x WSB   | TAS-H58  | 13.5            | 0.402      | 4           | 66.4                    | 66.7                | 6               | 18            | 120              | 280                 | 680           | 3080          | 3200                 |
| PWK x WSB   | TAS-H59  | 11.7            | 0.418      | 5           | 48.1                    | 100.0               | 5               | 18            | 200              | 520                 | 880           | 2320          | 2440                 |
| PWK x WSB   | TAS-H60  | 12              | 0.41554    | 3           | 30.9                    | 60.0                | 5               | 14            | 160              | 360                 | 640           | 3720          | 2160                 |
| PWK x WSB   | TAS-H62  | 11              | 0.395      | 5           | 41.2                    | 83.3                | 6               | 9             | 280              | 480                 | 920           | 3120          | 3160                 |
| PWK x WSB   | TAS-H63  | 12.3            | 0.072      | 3           | 28.6                    | 50.0                | 6               | 11            | 80               | 320                 | 560           | 2520          | 2360                 |
| PWK x WSB   | TAS-H109 | 12.3            | 0.362      | 6           | -                       | 100.0               | 6               | 12            | 80               | 560                 | 600           | 2560          | 1960                 |
| PWK x WSB   | TAS-H110 | 11.5            | 0.354      | 5           | 43.9                    | 83.3                | 6               | 17            | 160              | 360                 | 560           | 3240          | 2880                 |
| PWK x WSB   | TAS-H111 | 11.9            | 0.468      | 5           | 45.4                    | 71.4                | 7               | 16            | 80               | 640                 | 600           | 2880          | 1680                 |
| PWK x WSB   | TAS-H61  | 10.4            | 0.395      | 0           | n.a.                    | 0.0                 | 5               | 6             | 40               | 200                 | 640           | 2280          | 1360                 |

" - " data missing.

"n.a.", not apply.

**Table S1.** Phenotype scores for each of the 106 mice at 63 day-old. (continued)

| Genotype      | ID       | Body weight (g) | ROW (mg/g) | Litter size | Total litter weight (g) | Embryo survival (%) | Placental scars | Corpora lutea | Antral follicles | Secondary follicles | Large primary | Small primary | Primordial follicles |
|---------------|----------|-----------------|------------|-------------|-------------------------|---------------------|-----------------|---------------|------------------|---------------------|---------------|---------------|----------------------|
| WSB x PWK     | TAS-H40  | 12.9            | 0.380      | 5           | 51                      | 62.5                | 8               | 17            | 240              | 440                 | 1360          | 4280          | 1920                 |
| WSB x PWK     | TAS-H41  | 13.4            | 0.363      | 5           | 54.3                    | 71.4                | 7               | 26            | 280              | 560                 | 840           | 4320          | 1600                 |
| WSB x PWK     | TAS-H72  | 15.9            | 0.387      | 7           | 66.1                    | 77.8                | 9               | 17            | 240              | 480                 | 1040          | 4240          | 4000                 |
| WSB x PWK     | TAS-H74  | 12.2            | 0.388      | 6           | 55.8                    | 66.7                | 9               | 25            | 320              | 400                 | 840           | 3560          | 3480                 |
| WSB x PWK     | TAS-H86  | 16.7            | 0.357      | 10          | 106.8                   | 100.0               | 10              | 22            | 240              | 720                 | 1120          | 4480          | 3240                 |
| WSB x PWK     | TAS-H87  | 14.1            | 0.377      | 7           | 55.1                    | 63.6                | 11              | 16            | 200              | 520                 | 840           | 3120          | 1680                 |
| WSB x PWK     | TAS-H88  | 16.6            | 0.352      | 6           | 64.7                    | 85.7                | 7               | 15            | 240              | 160                 | 920           | 3120          | 2800                 |
| WSB x PWK     | TAS-H101 | 14.7            | 0.409      | 6           | 46.4                    | 85.7                | 7               | 23            | 280              | 400                 | 640           | 2400          | 1960                 |
| WSB x PWK     | TAS-H102 | 16              | 0.420      | 5           | 42.4                    | 50.0                | 10              | 19            | 160              | 400                 | 880           | 3000          | 2240                 |
| WSB x PWK     | TAS-H73  | 14.2            | 0.282      | 0           | n.a.                    | n.a.                | 0               | 10            | 360              | 680                 | 1000          | 2440          | 2200                 |
| CZECH x LEWES | TAS-H97  | 12.7            | 0.380      | 6           | 62                      | 100.0               | 6               | 26            | 120              | 480                 | 920           | 2480          | 1160                 |
| CZECH x LEWES | TAS-H98  | 12.8            | 0.371      | 6           | 45.4                    | 100.0               | 6               | 19            | 440              | 360                 | 1000          | 2960          | 1080                 |
| CZECH x LEWES | TAS-H118 | 13.5            | 0.407      | 7           | 60.6                    | 100.0               | 7               | 15            | 280              | 640                 | 880           | 2560          | 2240                 |
| CZECH x LEWES | TAS-H119 | 13.1            | 0.468      | 8           | 79                      | 100.0               | 8               | 16            | 240              | 640                 | 1400          | 3440          | 1800                 |
| CZECH x LEWES | TAS-H121 | 12              | 0.432      | 7           | 58.1                    | 100.0               | 7               | 18            | 200              | 720                 | 1160          | 1360          | 800                  |
| CZECH x LEWES | TAS-H138 | 14              | 0.589      | 10          | 86.6                    | 100.0               | 10              | 22            | 280              | 520                 | 1040          | 3520          | 1160                 |
| CZECH x LEWES | TAS-H139 | 12.8            | 0.550      | 8           | 85.6                    | 88.9                | 9               | 24            | 520              | 760                 | 1360          | 3840          | 1760                 |
| CZECH x LEWES | TAS-H96  | 11.9            | 0.272      | 0           | n.a.                    | n.a.                | 0               | 7             | 320              | 840                 | 960           | 2440          | 880                  |
| CZECH x LEWES | TAS-H120 | 12.1            | 0.196      | 0           | n.a.                    | n.a.                | 0               | 7             | 120              | 280                 | 480           | 2480          | 2120                 |
| CZECH x LEWES | TAS-H122 | 12.7            | 0.242      | 0           | n.a.                    | n.a.                | 0               | 7             | 80               | 280                 | 480           | 1920          | 680                  |
| CZECH x LEWES | TAS-H123 | 12.8            | 0.375      | 0           | n.a.                    | n.a.                | 0               | 9             | 80               | 680                 | 1120          | 1960          | 480                  |
| CZECH x LEWES | TAS-H124 | 14              | 0.202      | 0           | n.a.                    | n.a.                | 0               | 0             | 200              | 280                 | 720           | 800           | 560                  |
| LEWES x CZECH | TAS-H47  | -               | 0.408      | 6           | 51.3                    | 85.7                | 7               | 14            | 200              | 440                 | 960           | 3160          | 1640                 |
| LEWES x CZECH | TAS-H49  | -               | 0.411      | 6           | 62.7                    | 85.7                | 7               | 22            | 200              | 720                 | 1560          | 4120          | 2760                 |
| LEWES x CZECH | TAS-H50  | -               | 0.366      | 3           | 27.2                    | 100.0               | 3               | 13            | 360              | 800                 | 920           | 2560          | 1800                 |
| LEWES x CZECH | TAS-H51  | -               | 0.453      | 5           | 66.9                    | 71.4                | 7               | 16            | 280              | 520                 | 1200          | 3400          | 1360                 |
| LEWES x CZECH | TAS-H54  | 12.7            | 0.398      | 7           | 78.7                    | 100.0               | 7               | 21            | 280              | 920                 | 560           | 2920          | 1720                 |
| LEWES x CZECH | TAS-H55  | 13.4            | 0.485      | 8           | 72.5                    | 100.0               | 8               | 23            | 240              | 800                 | 1200          | 3360          | 2200                 |
| LEWES x CZECH | TAS-H56  | 12.3            | 0.507      | 7           | 61.4                    | 100.0               | 7               | 16            | 160              | 600                 | 1120          | 2800          | 1280                 |
| LEWES x CZECH | TAS-H64  | 13.1            | 0.442      | 8           | -                       | 88.9                | 9               | 21            | 580              | 720                 | 1160          | 5200          | 4000                 |
| LEWES x CZECH | TAS-H65  | 12.2            | 0.397      | 6           | -                       | 60.0                | 10              | -             | 340              | 240                 | 600           | 2480          | 2440                 |
| LEWES x CZECH | TAS-H48  | -               | 0.417      | 0           | n.a.                    | 0.0                 | 1               | 9             | 120              | 720                 | 1840          | 4560          | 1640                 |
| CZECH x WSB   | TAS-H132 | 13.5            | 0.397      | 7           | 63.2                    | 77.8                | 9               | 17            | 200              | 320                 | 600           | 2560          | 800                  |
| CZECH x WSB   | TAS-H134 | 12.4            | 0.422      | 7           | 66.2                    | 100.0               | 7               | 16            | 280              | 360                 | 720           | 3040          | 1920                 |
| CZECH x WSB   | TAS-H135 | 11.9            | 0.429      | 5           | 62.6                    | 83.3                | 6               | 12            | 440              | 360                 | 640           | 2160          | 1120                 |
| CZECH x WSB   | TAS-H136 | 11.3            | 0.399      | 7           | 67.3                    | 87.5                | 8               | 16            | 360              | 440                 | 640           | 2880          | 1880                 |
| CZECH x WSB   | TAS-H137 | 16.3            | 0.424      | 6           | 50.5                    | 85.7                | 7               | 24            | 200              | 480                 | 920           | 2320          | 2240                 |
| CZECH x WSB   | TAS-H143 | 11.7            | 0.408      | 5           | 49.1                    | 62.5                | 8               | -             | -                | -                   | -             | -             | -                    |
| CZECH x WSB   | TAS-H168 | -               | 0.518      | 7           | -                       | 100.0               | 7               | 26            | 240              | 440                 | 720           | 2680          | 1000                 |
| CZECH x WSB   | TAS-H133 | 10.8            | 0.322      | 0           | n.a.                    | 0.0                 | 6               | 6             | 40               | 160                 | 440           | 1440          | 1800                 |
| CZECH x WSB   | TAS-H144 | 11              | 0.299      | 0           | n.a.                    | 0.0                 | 8               | -             | -                | -                   | -             | -             | -                    |
| WSB x CZECH   | TAS-H52  | 11.8            | 0.472      | 5           | 74.9                    | 71.4                | 7               | 19            | 200              | 600                 | 680           | 2880          | 1880                 |
| WSB x CZECH   | TAS-H53  | 11.8            | 0.465      | 7           | 53.7                    | 100.0               | 7               | 24            | 320              | 640                 | 680           | 4360          | 1880                 |
| WSB x CZECH   | TAS-H69  | 13.6            | 0.401      | 8           | 48.8                    | 80.0                | 10              | 13            | 360              | 560                 | 680           | 2480          | 2920                 |
| WSB x CZECH   | TAS-H70  | 15              | 0.434      | 6           | 74.8                    | 66.7                | 9               | 17            | 280              | 400                 | 880           | 3520          | 3280                 |
| WSB x CZECH   | TAS-H71  | 12.5            | 0.491      | 7           | 69.9                    | 100.0               | 7               | 16            | 360              | 480                 | 760           | 3800          | 2840                 |
| WSB x CZECH   | TAS-H80  | 13.2            | 0.460      | 8           | 84.7                    | 100.0               | 8               | 26            | 240              | 560                 | 960           | 4080          | 3240                 |
| WSB x CZECH   | TAS-H81  | 12.8            | 0.465      | 5           | 66.4                    | 71.4                | 7               | 24            | 400              | 800                 | 1200          | 3600          | 2560                 |
| WSB x CZECH   | TAS-H82  | 12.4            | 0.468      | 8           | 88.4                    | 80.0                | 10              | 33            | 120              | 680                 | 960           | 3440          | 2080                 |
| WSB x CZECH   | TAS-H83  | 14.2            | 0.485      | 8           | 82.7                    | 72.7                | 11              | 33            | 400              | 800                 | 680           | 2120          | 1320                 |
| WSB x CZECH   | TAS-H84  | 11.7            | 0.473      | 3           | 32.7                    | 37.5                | 8               | 20            | 400              | 840                 | 600           | 2240          | 1120                 |
| WSB x CZECH   | TAS-H115 | 13.3            | 0.374      | 7           | 68.8                    | 100.0               | 7               | 19            | 120              | 360                 | 1120          | 2280          | 1040                 |
| WSB x CZECH   | TAS-H116 | 16.2            | 0.495      | 7           | 78.1                    | 63.6                | 11              | -             | -                | -                   | -             | -             | -                    |
| WSB x CZECH   | TAS-H117 | 12.8            | 0.355      | 4           | 30.9                    | 66.7                | 6               | 17            | 200              | 560                 | 520           | 2400          | 1280                 |

" - " data missing.

"n.a.", not apply.

**Table S2.** Phenotype scores for each of the 22 mice at 120 day-old.

| Genotype    | ID       | Body weight (g) | ROW (mg/g) | Litter size | Total litter weight (g) | Embryo survival (%) | Placental scars | Corpora lutea | Antral follicles | Secondary follicles | Large primary | Small primary | Primordial follicles |
|-------------|----------|-----------------|------------|-------------|-------------------------|---------------------|-----------------|---------------|------------------|---------------------|---------------|---------------|----------------------|
| PWK x LEWES | TAS-H141 | 16.8            | 0.331      | 7           | 60.8                    | 100.0               | 7               | 14            | 80               | 280                 | 840           | 1680          | 1200                 |
| PWK x LEWES | TAS-H142 | 15.7            | 0.415      | 8           | 84.9                    | 80.0                | 10              | 21            | 160              | 440                 | 800           | 2240          | 1960                 |
| PWK x LEWES | TAS-H150 | 17.9            | 0.378      | 5           | 48.1                    | 83.3                | 6               | 14            | 80               | 480                 | 1560          | 2560          | 1160                 |
| PWK x LEWES | TAS-H151 | 15.7            | 0.308      | 7           | 56.1                    | 100.0               | 7               | 15            | 40               | 400                 | 960           | 2000          | 1000                 |
| PWK x LEWES | TAS-H175 | 13.6            | 0.332      | 7           | 36.7                    | 100.0               | 7               | 13            | 40               | 200                 | 480           | 1520          | 1000                 |
| PWK x LEWES | TAS-H176 | 14.1            | 0.348      | 8           | 71.9                    | 88.9                | 9               | 16            | 200              | 200                 | 360           | 1120          | 840                  |
| PWK x LEWES | TAS-H177 | 14.1            | 0.359      | 5           | 64.2                    | 83.3                | 6               | 23            | 160              | 360                 | 600           | 1640          | 1080                 |
| PWK x LEWES | TAS-H179 | 13.6            | 0.402      | 6           | 59.9                    | 75.0                | 8               | 17            | 280              | 240                 | 600           | 1840          | 1080                 |
| PWK x LEWES | TAS-H178 | 14.4            | 0.123      | 0           | n.a.                    | n.a.                | 0               | 5             | 120              | 320                 | 520           | 1720          | 1520                 |
| PWK x LEWES | TAS-H140 | 13.9            | 0.201      | 0           | n.a.                    | n.a.                | 0               | 5             | 280              | 400                 | 560           | 1440          | 1160                 |
| PWK x LEWES | TAS-H180 | 13.2            | 0.159      | 0           | n.a.                    | n.a.                | 0               | 6             | 160              | 400                 | 920           | 1560          | 1920                 |
| LEWES x PWK | TAS-H130 | 16.3            | 0.329      | 7           | 66.8                    | 100.0               | 7               | 20            | 40               | 360                 | 840           | 2480          | 1720                 |
| LEWES x PWK | TAS-H153 | 15.7            | 0.344      | 6           | 56.7                    | 85.7                | 7               | 18            | 120              | 200                 | 560           | 2240          | 1520                 |
| LEWES x PWK | TAS-H154 | 18              | 0.394      | 9           | 80.3                    | 90.0                | 10              | 21            | 40               | 440                 | 760           | 2320          | 1960                 |
| LEWES x PWK | TAS-H158 | -               | 0.379      | 8           | -                       | 88.9                | 9               | 16            | 160              | 120                 | 800           | 1440          | 1360                 |
| LEWES x PWK | TAS-H159 | -               | 0.379      | 9           | -                       | 90.0                | 10              | 17            | 200              | 360                 | 520           | 1640          | 1240                 |
| LEWES x PWK | TAS-H181 | 15.8            | 0.343      | 9           | 73.2                    | 100.0               | 9               | 18            | 80               | 320                 | 960           | 1360          | 1160                 |
| LEWES x PWK | TAS-H182 | 16.2            | 0.388      | 9           | -                       | 100.0               | 9               | 21            | 240              | 520                 | 920           | 1600          | 1360                 |
| LEWES x PWK | TAS-H131 | 16.1            | 0.210      | 0           | n.a.                    | n.a.                | 0               | 0             | 120              | 440                 | 720           | 2240          | 1720                 |
| LEWES x PWK | TAS-H152 | 14.8            | 0.153      | 0           | n.a.                    | 0.0                 | 1               | 1             | 320              | 320                 | 1320          | 2400          | 1760                 |
| LEWES x PWK | TAS-H157 | -               | 0.191      | 0           | n.a.                    | n.a.                | 0               | 8             | 360              | 240                 | 1000          | 2440          | 1440                 |
| LEWES x PWK | TAS-H183 | 17.1            | 0.232      | 0           | n.a.                    | n.a.                | 0               | 7             | 40               | 520                 | 1160          | 2080          | 2200                 |

" - " data missing.

"n.a.", not apply.

**Table S3.** Classification of follicles used in the study.

| <b>Groups</b>                  | <b>Classes<sup>1</sup></b>           | <b>Descriptions<sup>1</sup></b>                                                                             |
|--------------------------------|--------------------------------------|-------------------------------------------------------------------------------------------------------------|
| Smaller follicles <sup>2</sup> | Primordial follicles                 | A small oocyte surrounded by a layer of few or no fusiform-shaped granulosa cells.                          |
|                                | Small primary follicles              | A single complete ring of granulosa cells (no more than 15 cells) surrounding a small oocyte.               |
|                                | Large primary follicles <sup>4</sup> | A single complete ring of granulosa cells (more than 15 cells) surrounding a growing oocyte.                |
| Larger follicles <sup>3</sup>  | Secondary follicles                  | Multiple layers of granulosa cells surrounding an oocyte but had no major cavity containing follicle fluid. |
|                                | Antral follicles                     | Multiple layers of granulosa cells surrounding an oocyte with a single or multiple major cavities.          |

<sup>1</sup>Classes and their descriptions are based on personal communications with P. Hoyer.

<sup>2</sup>Total number of primordial follicles and small primary follicles.

<sup>3</sup>Total number of secondary follicles and antral follicles.

<sup>4</sup>Transitional follicles between “small primary” to “large primary” and between “large primary” and “secondary” were scored as large primary follicles when the state was ambiguous in several cases.

**Table S4.** Test for delayed puberty using two hybrid genotypes.

| Female hybrid age                                                               | Successful pregnancies <sup>1</sup><br>% | Body weight<br>g (SE) | ROW <sup>2</sup><br>mg/g (SE) | Smaller follicles<br>x10 <sup>2</sup> (SE) | Larger follicles x10 <sup>2</sup><br>(SE) | Corpora lutea<br>(SE) | Placental scars<br>(SE) | Embryo survival <sup>3</sup><br>% (SE) | Litter size<br>(SE) | Individual pup weight<br>g (SE) | Total litter weight<br>g (SE) |
|---------------------------------------------------------------------------------|------------------------------------------|-----------------------|-------------------------------|--------------------------------------------|-------------------------------------------|-----------------------|-------------------------|----------------------------------------|---------------------|---------------------------------|-------------------------------|
| <i>M. m. musculus</i> <sup>PWK</sup> x <i>M. m. domesticus</i> <sup>LEWES</sup> |                                          |                       |                               |                                            |                                           |                       |                         |                                        |                     |                                 |                               |
| 63 day-old                                                                      | 91 (10/11)                               | 13.2 (0.4)            | 0.35 (0.02)                   | 65.1 (6.6)                                 | 7.2 (1.3)                                 | 13.7 (2.0)            | 6.0 (0.6)               | 95.8 (2.8)                             | 5.7 (0.6)           | 8.9 (0.1)                       | 49.9 (3.3)                    |
| 120 day-old                                                                     | 73 (8/11)                                | 14.8 (0.5)↑           | 0.31 (0.03)                   | 30.2 (1.9)↓*                               | 4.8 (0.4)                                 | 13.5 (1.8)            | 5.5 (1.1)               | 88.8 (3.5)                             | 4.8 (1.0)           | 9.2 (0.1)                       | 60.3 (5.1)                    |
| <i>p</i> value                                                                  |                                          | <i>p</i> = 0.009      |                               | <i>p</i> = 0.0006                          |                                           |                       |                         |                                        |                     |                                 |                               |
| <i>M. m. domesticus</i> <sup>LEWES</sup> x <i>M. m. musculus</i> <sup>PWK</sup> |                                          |                       |                               |                                            |                                           |                       |                         |                                        |                     |                                 |                               |
| 63 day-old                                                                      | 90 (9/10)                                | 13.6 (0.5)            | 0.33 (0.02)                   | 55.2 (4.5)                                 | 6.9 (0.6)                                 | 15.6 (1.6)            | 6.6 (0.8)               | 78.9 (5.4)                             | 5.2 (0.7)           | 9.4 (0.1)                       | 56.4 (3.8)                    |
| 120 day-old                                                                     | 64 (7/11)                                | 16.3 (0.3)↑*          | 0.30 (0.03)                   | 36.1 (2.0)↓*                               | 5.1 (0.4)↓                                | 13.4 (2.4)            | 5.6 (1.4)               | 92.0 (3.4)                             | 5.2 (1.3)           | 8.9 (0.2)↓                      | 69.3 (5.0)                    |
| <i>p</i> value                                                                  |                                          | <i>p</i> = 0.004      |                               | <i>p</i> = 0.002                           | <i>p</i> = 0.03                           |                       |                         |                                        |                     | <i>p</i> = 0.03                 |                               |

<sup>1</sup> Successful pregnancies: number of females that reproduced / total number of females

<sup>2</sup> Relative ovary weight: milligrams of ovary / gram of body weight

<sup>3</sup> Embryo survival: litter size at birth / placental scars

↑ or ↓ indicate significantly larger or smaller versus the 63 day-old genotype based on Wilcoxon rank sum test based on raw p-values (*p* < 0.05).

\* indicates comparisons that remained significant after Bonferroni correction  $\alpha = 0.0045$ . SE, Standard Error.



**Table S5.** Comparisons of reproductive parameters between hybrid female progeny of reciprocal crosses (n=106).

| F1 genotype<br>(female<br>x male)                                                 | Successful<br>pregnancies <sup>1</sup><br>% | Body weight<br>g (SE) | ROW <sup>2</sup><br>mg/g (SE) | Smaller<br>follicles<br>x10 <sup>2</sup> (SE) | Larger follicles<br>x10 <sup>2</sup> (SE) | Corpora lutea<br>(SE) | Placental<br>scars<br>(SE) | Embryo<br>survival <sup>3</sup><br>% (SE) | Litter size<br>(SE) | Individual pup<br>weight<br>g<br>(SE) | Total litter<br>weight<br>(SE) | g |
|-----------------------------------------------------------------------------------|---------------------------------------------|-----------------------|-------------------------------|-----------------------------------------------|-------------------------------------------|-----------------------|----------------------------|-------------------------------------------|---------------------|---------------------------------------|--------------------------------|---|
| <i>M. m. musculus</i> <sup>PWK</sup> x <i>M. m. domesticus</i> <sup>LEWES</sup>   | 91 (10/11)                                  | 13.2 (0.4)            | 0.35 (0.02)                   | 65.1 (6.6)                                    | 7.2 (1.3)                                 | 13.7 (2.0)            | 6.0 (0.6)                  | 95.8 (2.8)↑                               | 5.7 (0.6)           | 8.9 (0.1)↓                            | 49.9 (3.3)                     |   |
| <i>M. m. domesticus</i> <sup>LEWES</sup> x <i>M. m. musculus</i> <sup>PWK</sup>   | 90 (9/10)                                   | 13.6 (0.5)            | 0.33 (0.02)                   | 55.2 (4.5)                                    | 6.9 (0.6)                                 | 15.6 (1.6)            | 6.6 (0.8)                  | 78.9 (5.4)↓                               | 5.2 (0.7)           | 9.4 (0.1)↑                            | 56.4 (3.8)                     |   |
| <i>p</i> value                                                                    |                                             |                       |                               |                                               |                                           |                       |                            | <i>p</i> = 0.02                           |                     | <i>p</i> = 0.006                      |                                |   |
| <i>M. m. musculus</i> <sup>PWK</sup> x <i>M. m. domesticus</i> <sup>WSB</sup>     | 90 (9/10)                                   | 12.1 (0.4)↓*          | 0.41 (0.02)                   | 52.4 (2.8)                                    | 5.4 (0.5)                                 | 14.3 (1.5)            | 5.9 (0.2)↓                 | 70.0 (9.3)                                | 4.2 (0.6)↓          | 9.7 (0.2)                             | 43.5 (4.1)↓                    |   |
| <i>M. m. domesticus</i> <sup>WSB</sup> x <i>M. m. musculus</i> <sup>PWK</sup>     | 90 (9/10)                                   | 14.7 (0.5)↑*          | 0.37 (0.01)                   | 60.1 (4.2)                                    | 7.3 (0.6)                                 | 19.0 (1.6)            | 7.8 (1.0)↑                 | 73.7 (5.1)                                | 5.7 (0.8)↑          | 9.9 (0.1)                             | 60.3 (6.3)↑                    |   |
| <i>p</i> value                                                                    |                                             | <i>p</i> = 0.003      |                               |                                               |                                           |                       | <i>p</i> = 0.005           |                                           | <i>p</i> = 0.05     |                                       | <i>p</i> = 0.03                |   |
| <i>M. m. musculus</i> <sup>CZECH</sup> x <i>M. m. domesticus</i> <sup>LEWES</sup> | 58 (7/12)                                   | 12.9 (0.2)            | 0.37 (0.04)                   | 37.1 (3.9)↓                                   | 7.8 (0.8)                                 | 14.2 (2.3)            | 4.4 (1.2)                  | 98.4 (1.6)↑                               | 4.3 (1.1)           | 9.4 (0.1)                             | 53.7 (8.3)                     |   |
| <i>M. m. domesticus</i> <sup>LEWES</sup> x <i>M. m. musculus</i> <sup>CZECH</sup> | 90 (9/10)                                   | 12.7 (0.2)            | 0.43 (0.02)                   | 56.1 (5.4)↑                                   | 9.3 (0.6)                                 | 17.2 (1.6)            | 6.6 (0.8)                  | 79.2 (9.8)↓                               | 5.6 (0.8)           | 9.3 (0.1)                             | 60.1 (6.4)                     |   |
| <i>p</i> value                                                                    |                                             |                       |                               | <i>p</i> = 0.02                               |                                           |                       |                            | <i>p</i> = 0.0489                         |                     |                                       |                                |   |
| <i>M. m. musculus</i> <sup>CZECH</sup> x <i>M. m. domesticus</i> <sup>WSB</sup>   | 78 (7/9)                                    | 12.4 (0.6)            | 0.40 (0.02)                   | 39.8 (2.9)                                    | 6.2 (0.8)↓                                | 16.7 (2.6)            | 7.3 (0.3)                  | 66.3 (13.1)                               | 4.9 (1.0)           | 9.8 (0.1)↓*                           | 59.8 (3.3)                     |   |
| <i>M. m. domesticus</i> <sup>WSB</sup> x <i>M. m. musculus</i> <sup>CZECH</sup>   | 100 (13/13)                                 | 13.2 (0.4)            | 0.45 (0.01)                   | 52.2 (4.2)                                    | 8.9 (0.7)↑                                | 21.8 (1.9)            | 8.3 (0.5)                  | 77.7 (5.2)                                | 6.4 (0.5)           | 10.6 (0.1)↑*                          | 65.8 (5.2)                     |   |
| <i>p</i> value                                                                    |                                             |                       |                               |                                               | <i>p</i> = 0.02                           |                       |                            |                                           |                     | <i>p</i> < 0.0001                     |                                |   |

<sup>1</sup> Successful pregnancies: number of females that reproduced / total number of females

<sup>2</sup> Relative ovary weight: milligrams of ovary / gram of body weight

<sup>3</sup> Embryo survival: litter size / placental scars

↑ or ↓ indicate significantly larger or smaller versus the reciprocal genotype based on Wilcoxon rank sum test based on raw p-values (*p* < 0.05).

\* indicates comparisons that remained significant after Bonferroni correction  $\alpha = 0.0045$ . SE, Standard Error.

**Table S6.** Test for paternal polymorphism within subspecies for reproductive parameters (n=106).

| Cross<br>x male)                                                                  | (female) | Successful pregnancies <sup>1</sup><br>% | Body weight<br>g (SE) | ROW <sup>2</sup><br>mg/g (SE) | Smaller follicles<br>x10 <sup>2</sup> (SE) | Larger follicles<br>x10 <sup>2</sup> (SE) | Corpora lutea<br>(SE) | Placental scars<br>(SE) | Embryo survival <sup>3</sup><br>% | Litter size<br>(SE) | Individual pup weight<br>(SE) | Total litter weight<br>g (SE) |
|-----------------------------------------------------------------------------------|----------|------------------------------------------|-----------------------|-------------------------------|--------------------------------------------|-------------------------------------------|-----------------------|-------------------------|-----------------------------------|---------------------|-------------------------------|-------------------------------|
| <i>M. m. domesticus</i> polymorphism                                              |          |                                          |                       |                               |                                            |                                           |                       |                         |                                   |                     |                               |                               |
| <i>M. m. musculus</i> <sup>PWK</sup> x <i>M. m. domesticus</i> <sup>LEWES</sup>   |          | 91 (10/11)                               | 13.2 (0.4)            | 0.35 (0.02)↓                  | 65.1 (6.6)                                 | 7.2 (1.3)                                 | 13.7 (2.0)            | 6.0 (0.6)               | 95.8 (2.8)↑                       | 5.7 (0.6)↑          | 8.9 (0.1)↓*                   | 49.9 (3.3)                    |
| <i>M. m. musculus</i> <sup>PWK</sup> x <i>M. m. domesticus</i> <sup>WSB</sup>     |          | 90 (9/10)                                | 12.1 (0.4)            | 0.41 (0.02)↑                  | 52.4 (2.8)                                 | 5.4 (0.5)                                 | 14.3 (1.5)            | 5.9 (0.2)               | 70.0 (9.3)↓                       | 4.2 (0.6)↓          | 9.7 (0.2)↑*                   | 43.5 (4.1)                    |
| <i>p</i> value                                                                    |          |                                          |                       | <i>p</i> = 0.045              |                                            |                                           |                       | <i>p</i> = 0.009        |                                   | <i>p</i> = 0.01     |                               | <i>p</i> = 0.002              |
| <i>M. m. musculus</i> <sup>CZECH</sup> x <i>M. m. domesticus</i> <sup>LEWES</sup> |          | 58 (7/12)                                | 12.9 (0.2)            | 0.37 (0.04)                   | 37.1 (3.9)                                 | 7.8 (0.8)                                 | 14.2 (2.3)            | 4.4 (1.2)               | 98.4 (1.6)↑                       | 4.3 (1.1)           | 9.4 (0.1)                     | 53.7 (8.3)                    |
| <i>M. m. musculus</i> <sup>CZECH</sup> x <i>M. m. domesticus</i> <sup>WSB</sup>   |          | 78 (7/9)                                 | 12.4 (0.6)            | 0.40 (0.02)                   | 39.8 (2.9)                                 | 6.2 (0.8)                                 | 16.7 (2.6)            | 7.3 (0.3)               | 66.3 (13.1)↓                      | 4.9 (1.0)           | 9.8 (0.1)                     | 59.8 (3.3)                    |
| <i>p</i> value                                                                    |          |                                          |                       |                               |                                            |                                           |                       |                         | <i>p</i> = 0.009                  |                     |                               |                               |
| <i>M. m. musculus</i> polymorphism                                                |          |                                          |                       |                               |                                            |                                           |                       |                         |                                   |                     |                               |                               |
| <i>M. m. domesticus</i> <sup>LEWES</sup> x <i>M. m. musculus</i> <sup>PWK</sup>   |          | 90 (9/10)                                | 13.6 (0.5)            | 0.33 (0.02)↓                  | 55.2 (4.5)                                 | 6.9 (0.6)↓                                | 15.6 (1.6)            | 6.6 (0.8)               | 78.9 (5.4)                        | 5.2 (0.7)           | 9.4 (0.1)                     | 56.4 (3.8)                    |
| <i>M. m. domesticus</i> <sup>LEWES</sup> x <i>M. m. musculus</i> <sup>CZECH</sup> |          | 90 (9/10)                                | 12.7 (0.2)            | 0.43 (0.02)↑                  | 56.1 (5.4)                                 | 9.3 (0.6)↑                                | 17.2 (1.6)            | 6.6 (0.8)               | 79.2 (9.8)                        | 5.6 (0.8)           | 9.3 (0.1)                     | 60.1 (6.4)                    |
| <i>p</i> value                                                                    |          |                                          |                       | <i>p</i> = 0.007              |                                            | <i>p</i> = 0.02                           |                       |                         |                                   |                     |                               |                               |
| <i>M. m. domesticus</i> <sup>WSB</sup> x <i>M. m. musculus</i> <sup>PWK</sup>     |          | 90 (9/10)                                | 14.7 (0.5)↑           | 0.37 (0.01)↓*                 | 60.1 (4.2)                                 | 7.3 (0.6)                                 | 19.0 (1.6)            | 7.8 (1.0)               | 73.7 (5.1)                        | 5.7 (0.8)           | 9.9 (0.1)↓*                   | 60.3 (6.3)                    |
| <i>M. m. domesticus</i> <sup>WSB</sup> x <i>M. m. musculus</i> <sup>CZECH</sup>   |          | 100 (13/13)                              | 13.2 (0.4)↓           | 0.45 (0.01)↑*                 | 52.2 (4.2)                                 | 8.9 (0.7)                                 | 21.8 (1.9)            | 8.3 (0.5)               | 77.7 (5.2)                        | 6.4 (0.5)           | 10.6 (0.1)↑*                  | 65.8 (5.2)                    |
| <i>p</i> value                                                                    |          |                                          | <i>p</i> = 0.03       |                               | <i>p</i> = 0.004                           |                                           | <i>p</i> = 0.001      |                         |                                   |                     |                               |                               |

<sup>1</sup> Successful pregnancies: number of females that reproduced / total number of females<sup>2</sup> Relative ovary weight: milligrams of ovary / gram of body weight<sup>3</sup> Embryo survival: litter size/placental scars↑ or ↓ indicate significantly larger or smaller versus the hybrid genotypes that differ in paternal strain based on Wilcoxon rank sum test based on raw *p*-values (*p* < 0.05).\* indicates comparisons that remained significant after Bonferroni correction  $\alpha = 0.0045$ . SE, Standard Error.

**Table S7.** Test for maternal polymorphisms within subspecies for reproductive parameters (n=106).

| Cross                                    | (female x male) | Successful pregnancies <sup>1</sup><br>% | Body weight<br>g (SE) | ROW <sup>2</sup><br>mg/g (SE) | Smaller follicles<br>x10 <sup>2</sup> (SE) | Larger follicles<br>x10 <sup>2</sup> (SE) | Corpora lutea<br>(SE) | Placental scars<br>(SE) | Embryo survival <sup>3</sup><br>% (SE) | Litter size<br>(SE) | Individual pup weight<br>(SE) | Total litter weight<br>g (SE) |
|------------------------------------------|-----------------|------------------------------------------|-----------------------|-------------------------------|--------------------------------------------|-------------------------------------------|-----------------------|-------------------------|----------------------------------------|---------------------|-------------------------------|-------------------------------|
| <i>M. m. domesticus</i> polymorphism     |                 |                                          |                       |                               |                                            |                                           |                       |                         |                                        |                     |                               |                               |
| <i>M. m. domesticus</i> <sup>LEWES</sup> | x               | 90 (9/10)                                | 13.6 (0.5)            | 0.33 (0.02)                   | 55.2 (4.5)                                 | 6.9 (0.6)                                 | 15.6 (1.6)            | 6.6 (0.8)               | 78.9 (5.4)                             | 5.2 (0.7)           | 9.4 (0.1)↓                    | 56.4 (3.8)                    |
| <i>M. m. musculus</i> <sup>PWK</sup>     |                 |                                          |                       |                               |                                            |                                           |                       |                         |                                        |                     |                               |                               |
| <i>M. m. domesticus</i> <sup>WSB</sup>   | x <i>M.</i>     | 90 (9/10)                                | 14.7 (0.5)            | 0.37 (0.01)                   | 60.1 (4.2)                                 | 7.3 (0.6)                                 | 19.0 (1.6)            | 7.8 (1.0)               | 73.7 (5.1)                             | 5.7 (0.8)           | 9.9 (0.1)↑                    | 60.3 (6.3)                    |
| <i>m. musculus</i> <sup>PWK</sup>        |                 |                                          |                       |                               |                                            |                                           |                       |                         |                                        |                     |                               |                               |
| <i>p</i> value                           |                 |                                          |                       |                               |                                            |                                           |                       |                         |                                        |                     | <i>p</i> = 0.01               |                               |
| <i>M. m. domesticus</i> <sup>LEWES</sup> | x               | 90 (9/10)                                | 12.7 (0.2)            | 0.43 (0.02)                   | 56.1 (5.4)                                 | 9.3 (0.6)                                 | 17.2 (1.6)            | 6.6 (0.8)               | 79.2 (9.8)                             | 5.6 (0.8)           | 9.3 (0.1)↓*                   | 60.1 (6.4)                    |
| <i>M. m. musculus</i> <sup>CZECH</sup>   |                 |                                          |                       |                               |                                            |                                           |                       |                         |                                        |                     |                               |                               |
| <i>M. m. domesticus</i> <sup>WSB</sup>   | x               | 100 (13/13)                              | 13.2 (0.4)            | 0.45 (0.01)                   | 52.2 (4.2)                                 | 8.9 (0.7)                                 | 21.8 (1.9)            | 8.3 (0.5)               | 77.7 (5.2)                             | 6.4 (0.5)           | 10.6 (0.1)↑*                  | 65.8 (5.2)                    |
| <i>M. m. musculus</i> <sup>CZECH</sup>   |                 |                                          |                       |                               |                                            |                                           |                       |                         |                                        |                     |                               |                               |
| <i>p</i> value                           |                 |                                          |                       |                               |                                            |                                           |                       |                         |                                        |                     | <i>p</i> < 0.0001             |                               |
| <i>M. m. musculus</i> polymorphism       |                 |                                          |                       |                               |                                            |                                           |                       |                         |                                        |                     |                               |                               |
| <i>M. m. musculus</i> <sup>PWK</sup>     | x <i>M.</i>     | 91 (10/11)                               | 13.2 (0.4)            | 0.35 (0.02)                   | 65.1 (6.6)↑                                | 7.2 (1.3)                                 | 13.7 (2.0)            | 6.0 (0.6)               | 95.8 (2.8)                             | 5.7 (0.6)           | 8.9 (0.1)↓                    | 49.9 (3.3)                    |
| <i>m. domesticus</i> <sup>LEWES</sup>    |                 |                                          |                       |                               |                                            |                                           |                       |                         |                                        |                     |                               |                               |
| <i>M. m. musculus</i> <sup>CZECH</sup>   | x <i>M.</i>     | 58 (7/12)                                | 12.9 (0.2)            | 0.37 (0.04)                   | 37.1 (3.9)↓                                | 7.8 (0.8)                                 | 14.2 (2.3)            | 4.4 (1.2)               | 98.4 (1.6)                             | 4.3 (1.1)           | 9.4 (0.1)↑                    | 53.7 (8.3)                    |
| <i>m. domesticus</i> <sup>LEWES</sup>    |                 |                                          |                       |                               |                                            |                                           |                       |                         |                                        |                     |                               |                               |
| <i>p</i> value                           |                 |                                          |                       |                               | <i>p</i> = 0.006                           | <i>p</i> = 0.03                           |                       |                         |                                        |                     |                               |                               |
| <i>M. m. musculus</i> <sup>PWK</sup>     | x <i>M.</i>     | 90 (9/10)                                | 12.1 (0.4)            | 0.41 (0.02)                   | 52.4 (2.8)↑                                | 5.4 (0.5)                                 | 14.3 (1.5)            | 5.9 (0.2)↓              | 70.0 (9.3)                             | 4.2 (0.6)           | 9.7 (0.2)                     | 43.5 (4.1)                    |
| <i>m. domesticus</i> <sup>WSB</sup>      |                 |                                          |                       |                               |                                            |                                           |                       |                         |                                        |                     |                               |                               |
| <i>M. m. musculus</i> <sup>CZECH</sup>   | x <i>M.</i>     | 78 (7/9)                                 | 12.4 (0.6)            | 0.40 (0.02)                   | 39.8 (2.9)↓                                | 6.2 (0.8)                                 | 16.7 (2.6)            | 7.3 (0.3)↑              | 66.3 (13.1)                            | 4.9 (1.0)           | 9.8 (0.1)                     | 59.8 (3.3)                    |
| <i>m. domesticus</i> <sup>WSB</sup>      |                 |                                          |                       |                               |                                            |                                           |                       |                         |                                        |                     |                               |                               |
| <i>p</i> value                           |                 |                                          |                       |                               | <i>p</i> = 0.03                            | <i>p</i> = 0.006                          |                       |                         |                                        |                     |                               |                               |

<sup>1</sup> Successful pregnancies: number of females that reproduced / total number of females

<sup>2</sup> Relative ovary weight: milligrams of ovary / gram of body weight

<sup>3</sup> Embryo survival: litter size / placental scars

↑ or ↓ indicate significantly larger or smaller versus the hybrid genotypes that differ in maternal strain based on Wilcoxon rank sum test based on raw p-values (*p* < 0.05).

\* indicates comparisons that remained significant after Bonferroni correction  $\alpha = 0.0045$ . SE, Standard Error.

**Table S8.** Summary of F1 hybrid sterility between males and females.

| Parameters                                | Male hybrids*                                                                                      | Female hybrids                                                                                       |
|-------------------------------------------|----------------------------------------------------------------------------------------------------|------------------------------------------------------------------------------------------------------|
| Body weight <sup>1</sup>                  | 15% Increased                                                                                      | 4% Reduced                                                                                           |
| Reproductive organ <sup>2</sup>           | 39% Reduced                                                                                        | 2% Reduced                                                                                           |
| Number of germ cells <sup>3</sup>         | 74% Reduced                                                                                        | 22% Reduced                                                                                          |
| Polymorphism                              | <i>M. m. musculus</i>                                                                              | <i>M. m. musculus</i><br><i>M. m. domesticus</i>                                                     |
| Effects on reproductive incompatibilities | Greater in <i>M. m. musculus</i> <sup>CZECH</sup> relative to <i>M. m. musculus</i> <sup>PWK</sup> | Greater in <i>M. m. domesticus</i> <sup>WSB</sup> relative to <i>M. m. musculus</i> <sup>LEWES</sup> |

% is based on the average increase or decrease of combined intra-subspecific control versus combined inter-subspecific hybrids

<sup>1</sup> Measured at 60 day-old in males and 63 day-old in females.

<sup>2</sup> Relative testis weight (testis weight / body weight) in males and relative ovary weight (ovary weight / body weight) in females.

<sup>3</sup> Number of sperm in males and number of corpora lutea in females.

\*Data for male hybrid sterility is based on Good et al. (2008a)
